# Supplementary material for: Synergistic effect of graphene and multi-walled carbon nanotubes composite supported Pd nanocubes on enhancing catalytic activity for electro-oxidation of formic acid
Source: Royal Society of Chemistry journal article supplement (doi:10.1039/c5cy02217g), 2016-01-01
Supplement: c5cy02217g1.pdf [file c5cy02217g1.pdf]

## Supporting Information

### Synergistic Effect of Graphene and Multi-Walled Carbon Nanotubes Composite supported Pd Nanocubes on Enhancing Catalytic Activity for Electro-Oxidation of Formic Acid

Ammar Bin Yousaf, M. Imran, Akif Zeb, Xiao Xie, Kuang Liang, Xiao Zhou, Cheng-Zong Yuan, and An-Wu Xu\*

Division of Nanomaterials and Chemistry, Hefei National Laboratory for Physical Sciences at Microscale, University of Science and Technology of China, Hefei, Anhui 230026, PR China

\*Corresponding Author E-mail: [anwuxu@ustc.edu.cn](mailto:anwuxu@ustc.edu.cn)

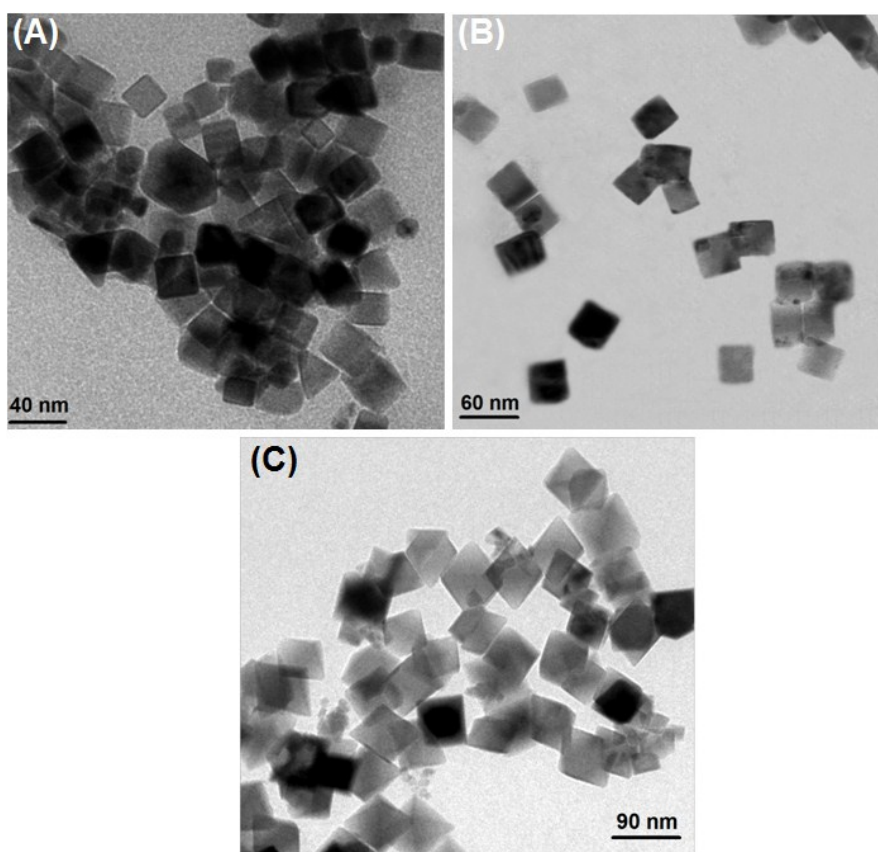

**Fig. S1** Controlled growth of Pd along  $\langle 100 \rangle$  direction (a) by using  $0.625 \times 10^{-2}$  molar  $C_{16}TAB$ , obtained twined structures along with Pd-NCs  $\langle 100 \rangle$  (b) by using  $1.25 \times 10^{-2}$  molar  $C_{16}TAB$ , obtained pure Pd-NCs  $\langle 100 \rangle$  and (c) by using  $2.5 \times 10^{-2}$  molar  $C_{16}TAB$ , obtained edge-truncated cubic feature  $\langle 100 \rangle$ ,  $\langle 110 \rangle$  &  $\langle 111 \rangle$  directions.

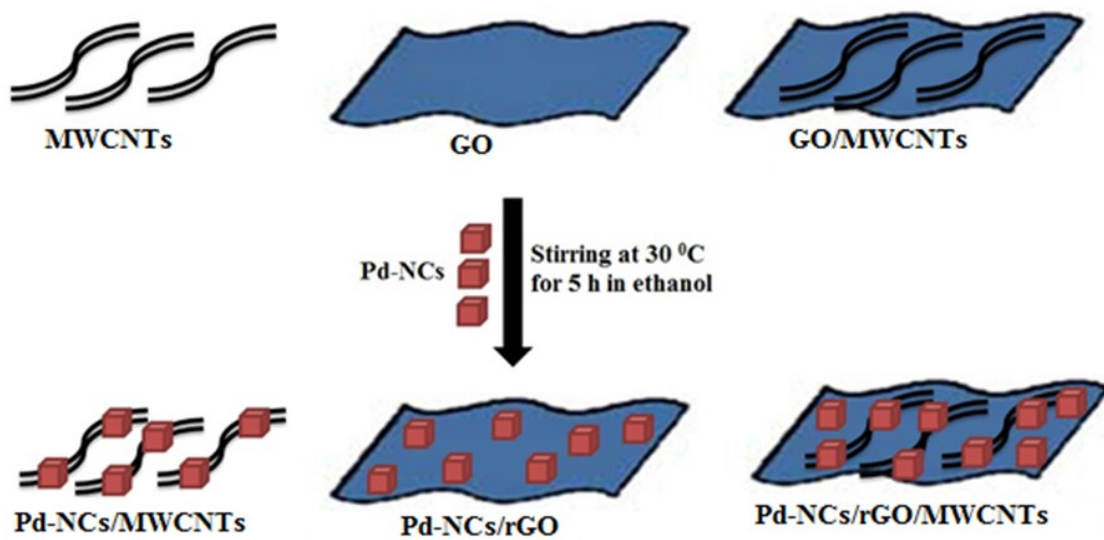

**Fig. S2** Schematic representation for the synthesis of Pd nanocubes loaded on different support materials.

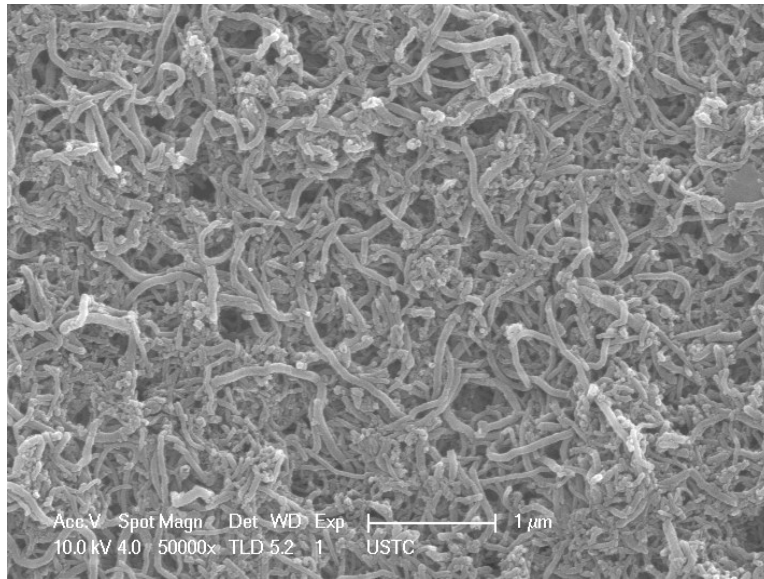

**Fig. S3** SEM image of functionalized multi-walled carbon nanotubes (MWCNTs).

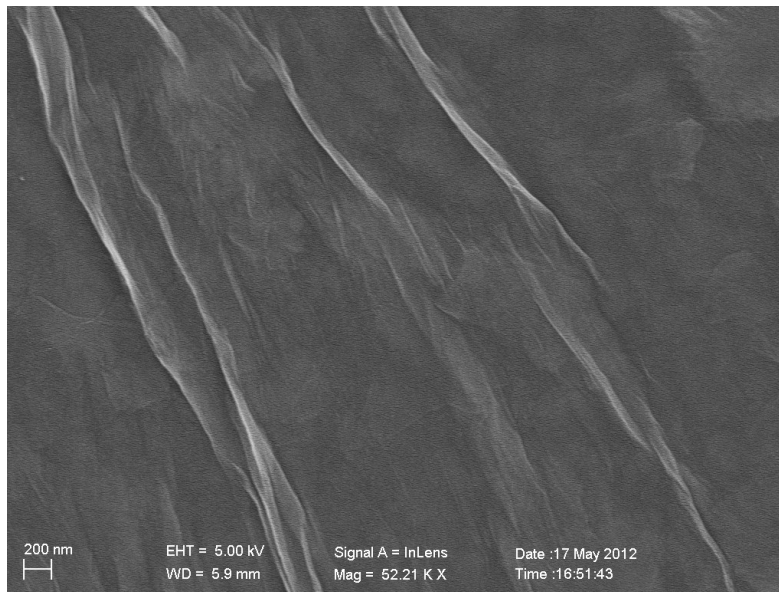

**Fig. S4** SEM image of graphene nanosheets (rGO)

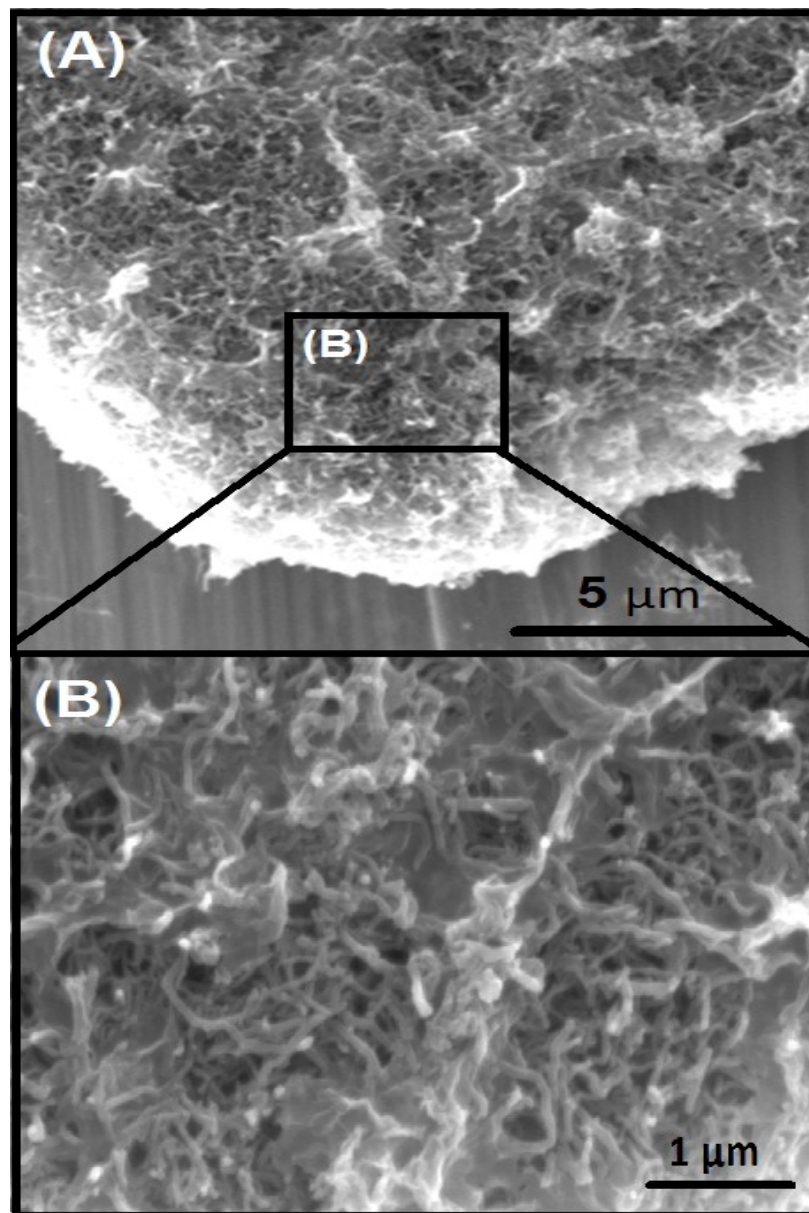

**Fig. S5** SEM image of 3D porous rGO/MWCNTs composite material.

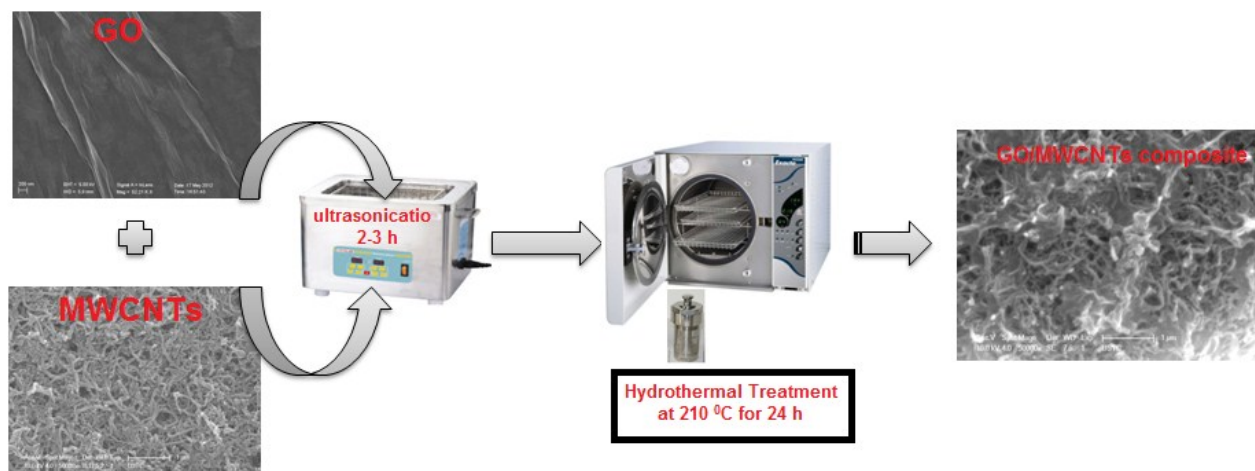

**Fig. S6** Schematic representation for the synthesis of 3D porous GO/MWCNTs composite material.
